# Supplementary material for: Genomics analysis of genes encoding respiratory burst oxidase homologs (RBOHs) in jatropha and the comparison with castor bean
Source: PeerJ journal article supplement (doi:10.7717/peerj.7263), 2019-07-11
Supplement: Supplementary_File_S1.pdf [file Supplementary_File_S1.pdf]

1141 ggtaaataatgaatctagccaaccactaaattatattcgaggttataataatttgcata  
1201 gtggttaatttcttgtatcaataactaatcaaatatgatttattaattaatgttgacaag  
1261 gaaataaaaaccctttacctaataatTTTTactactactatTTTTatTTtaatttatttt  
1321 ttgttgTTTTgtaatgctctTTTTTTTTaatttaacttaaaaaaatattgcctTTTT  
53 M Q Q S P E F A K E V L M A I R  
1381 atttctacagGTATGCAACAATCACCAGAATTTGCTAAAGAGGTTTTAATGGCAATAAGA  
69 G R G K K S K I D M T K R E L H G Y W H  
1441 GGAAGAGGAAAAAAAAAGTAAATGATATGACAAAAAGAGAACTCCATGGTTACTGGCAT  
89 R L T D P C F N S R V K I F F D M  
1501 AGATTGACTGACCCTTGCTTCAATTCAAGAGTGAAAATTTCTTTGACATgtaatttatac  
1561 aataatgattctgcaaattctTTTTTTTTTTTTTTTTTTTTTgaaaagcaaattcttatttt  
1621 tctttgacatggaattctttatatatatatatatatatatataataatgtttat  
106 C D  
1681 ccaaccaatatttctgataggttctTTTTTcattcaatggctTTTTTccttcagGTGTG  
108 K N M D G R I N K M D I K Q  
1741 ACAAAAATATGGATGGAAGAATTAATAAGATGGACATCAAGCAGgttggtcaaatttcc  
1801 ctatctacatatatttatattcaattatacattggaggttgctcacctagtacaagaa  
1861 aaccaaagttttaacatgctTTTTTTTccttaattaattctgtttgaaaaaaaaattc  
1921 aattctttcatttgaataaggttaatttacagaacgaaatacttttgaagtattataggt  
1981 catataattggattgtTTTTTTTTTctagctctgtatattgagcgatggaaaatcgaatc  
2041 taatttttctcaagttatatacgtacttattatcaagagtctgtataattttaaattta  
2101 tattttaatctaagaacaagcattgggtcaattttgttcgattttcacaaaattaaata  
122 N I  
2161 atcgagaccaaaaaatttcaaaaattattaaaattttgttttgacttttgacagAATA  
124 L L I A S T N K L S L T Q D Q A E E N A  
2221 TTTTGCTGATTGCTTCAACAAATAAATGTCTCTAACACAAGACCAAGCAGAGGAAAATG  
144 T L I M E A L D T Q G R G F I E

2281 C T A C T T T A A T C A T G G A A G C T C T T G A C A C T C A A G G C C G G G G C T T T A T C G A G g t g c t c a a t t  
2341 t a a c t t t t t t a t t c a t a t a t t t a t a a g g t t t t a t c a a t t t t a a t c t a a t t a a t a a t t a a  
160 L S Q L A A L F K I S L P M R G S  
2401 t t t g c a t g a a g C T A T C T C A A C T A G C A G C T C T C T T C A A A A T A A G C T T A C C A A T G A G G G G C T  
177 L L P N R N H K S N S D L E D H Q D D Q  
2461 C A C T A T T A C C C A A C A G A A A T C A C A A A A G T A A C A G T G A C C T G G A A G A T C A C C A A G A T G A T C  
197 P I M S K P E V L F R A H W R R G W I V  
2521 A A C C A A T C A T G T C A A A G C C A G A A G T G T T G T T T C G A G C T C A T T G G A G G A G A G G A T G G A T A G  
217 V I W L V I C L S L F T W K F I Q Y K H  
2581 T T G T G A T T T G G T T G G T G A T T T G C C T G T C A C T T T T C A C A T G G A A G T T T A T T C A A T A C A A G C  
237 R T A F E V M G Y C L C T A K G A A E T  
2641 A T A G A A C A G C T T T T G A A G T A A T G G G T T A T T G C C T T T G C A C T G C T A A A G G A G C A G C T G A G A  
257 L K F N M A V I L L P V C R N T I T W L  
2701 C C T T A A A A T T T A A C A T G G C T G T C A T T C T T C T T C C T G T T T G T A G A A A T A C C A T T A C A T G G C  
277 R R K A T I N S F V P F N D N I N F H K  
2761 T T C G C A G G A A A G C A A C A A T C A A T T C T T T T G T A C C C T T C A A C G A T A A T A T C A A C T T C C A C A  
297  
2821 A G g t a a t t t t t a t t t t t a t c t t t c t a t c a a t a t t t g t t t c g t a c a a t a t a t t t c a t t t t  
2881 c g t t g t a c a g t c t t t c t c t t a t a a g t t c g a c c t t a t a c a g a a c c a t c t t g t t a a a a a a t  
2941 a t c a a c t t t t c t a t t g g a g c a t g t a a a a t a t a a t c t a a t c a a a a g g t t t g c a a c c a a t a a  
297 L I A G G I V V G V L L H G G T H L  
3001 a t a c a g T T A A T T G C A G G A G A A T A G T G G T T G G T G T T C T A C T C C A T G G A G G A A C T C A T C T A  
315 A C D F P R I S G S N R S I F R Q T I A  
3061 G C T T G T G A T T T T C C G A G A A T T A G T G G A T C T A A T C G A T C A A T T T T C C G G C A A A C T A T T G C C  
335 A R F G F H Q P S Y V Q I L T T T E V A  
3121 G C C C G A T T T G G G T T C C A T C A A C C T T C G T A T G T A C A A A T A T T A A C C A C G A C A G A A G T A G C A  
355 T G I A M V I L M A I A F L L A T K W P

3181 ACGGGAATTGCAATGGTAATACTAATGGCAATTGCATTTTTGCTAGCAACAAAATGGCCC  
375 R R Q S P L L P K S V R N V T G Y N A F  
3241 CGTCGCCAATCGCCTTTGCTGCCTAAATCTGTTAGAAATGTGACTGGTTATAACGCTTTC  
395 W Y S H H L L I L V Y V L L I V H S M F  
3301 TGGTACTCACATCACTTGCTCATTCTGTCTACGTCCTGCTCATTGTTCAATCAATGTT  
415 L F L T D N V T E K T  
3361 CTCTTTCTAACAGACAACGTAACGAAAAACGgtaagcatgcattttgttgaaactttc  
3421 agaaattatctattttgcctcctcaaaattcataaaattatattttgcttattttttgta  
426 T W M Y V A F P I M L Y T G E R F V R A  
3481 gACATGGATGTACGTTGCATTTCCAATCATGTTATACACCGGAGAGCGTTTTGTTGAGC  
446 I R S G F Y D A K I L K  
3541 CATAAGATCAGGGTTTTACGATGCAAAGATTTTGAAGgtaactcactttcttaaaatgaa  
3601 ataatcaagagcgcgtttaattcagctaattcatatcgaacaactagattatttaagtac  
458 A S  
3661 tataattattatatttttttagctaattaagcactacgcttcactatatgagcagGCAAG  
460 I Y P G K V L C L K L H K P E G F K Y K  
3721 TATTTATCCAGGGAAAGTTTTGTGTCTCAAGTTGCACAAACCAGAAGGTTTCAAGTACAA  
480 S G M Y I F L Q C P Q I S S F Q W  
3781 GAGTGGGATGTATATTTTCTTACAATGCCCTCAAATTTCTTCATTTCAATGgtaactaaa  
3841 ctacttataacaacattttcaactagtaattaagtgatatttataatttaactaa  
497 H P F S L T  
3901 tttcattatcttcttattgctttttgcctttcccaatttcagGCACCCATTTTCATTAAC  
503 S G P K D D H L S V H I R T L G D W S Y  
3961 TTCAGGGCCAAAGGATGATCACCTAAGTGCCATATTAGAACTCTTGGAGATTGGAGTTA  
523 Q I Y S L F Q E  
4021 TCAAATATACAGTCTCTTCCAAGAGgtaattatataaattcaccaatcaactttggttca  
531 E I

4081 agattaatagaaagctaaatattataaaaaagcttcaagatatttatgagttttgcagGAAAT  
533 L S G G V K T K Y P K I Y I D G P Y G S  
4141 ATTATCTGGTGGAGTAAAGACGAAGTACCCAAAAATTTACATTGACGGACCTTATGGTTC  
553 A S Q D Y V K Y D T V M L I G L G I G A  
4201 TGCTTCACAAGATTATGTCAAGTATGATACAGTGATGTTAATTGGGCTTGAATAGGAGC  
573 T P F I S I L K D L A N F D Q  
4261 CACACCTTTCATTAGCATCCTCAAAGATCTAGCTAATTTTGATCAGgtaattattctcca  
4321 tctttcgaataaaaactaattttgtcgaacgtgaattataataattgaaagagtattctt  
4381 acttaaatttaaaaaattagtcacaatctttcagttacttttaaaaatatagaaatata  
4441 tatttatatagtcataatcttcagtcagaaatcatagtaatttatccaaatttctattac  
588 A N C A  
4501 ttaatggtgttatcttaaccacataaaaaggtattctgactccatgcagGCCAATTGTGCA  
592 E S N I S R G P L K A Y F Y W V T R E Q  
4561 GAAAGCAACATTCAAGAGGTCCATTAAGCTTATTTTATTGGGTAACAAGAGAACAG  
612 S S F A W F R D S L R E I S K T N E K L  
4621 AGCTCCTTTGCTTGGTTTATAGAGATAGCCTCAGGGAAATATCAAAAACAAATGAAAACTG  
4681 gtaattatttatatttaaacatttcttttctctctgttttttttttttttttttttct  
632 A I I E M H N F  
4741 aaccattaattcctaattttgtctttctccttttagGCTATTATTGAAATGCACAACCTTC  
640 L T S V Y G E G D A R S A L L S L I Q A  
4801 TTAAGTAGTGTATATGGAGAAGGAGATGCAAGATCTGCTTTATTAAGTCTCATTCAAGCA  
660 L N Q T K N G V D V V S R T E  
4861 TTGAACCAAACCAAAAATGGCGTTGATGTTGTATCTAGAACTGAGgtaactcatttaatt  
4921 aaaattaaaataagatataataactatatttattattatttataaaattgaaattgaaat  
675 V P T Q F G R P N W F N I  
4981 gtctaaccaatggagtttcttagGTACCAACACAATTTGGTCGTCAAATTTGGTTCAACA  
688 F S K L A S R H R G E R I G

5041 TCTTCTCCAAATTGGCATCTAGACACAGAGGAGAACGTATTGgtaagctgattccccatt  
5101 tctttctcaataatttagtactaattttaataacctgtaattaataattttaataacagt  
5161 ttttaataataatttaaggaagaaaattaggttgattgatttaatgattgttcttaga  
5221 acacttaagaaataaagagaaaaacaagatggacaagaggatttataatagtgttaagagag  
5281 acaaatattaatTTTTTTTCTTAAGAAAAATTGAGAGTTTGATTGTTATCAATGAAGTAA  
5341 ataccgtaagagtgctttattcttaataagctgataattacttattaggagtaaact  
702 V F Y C  
5401 caaatgataataacttaattaacaaactTTTTTTTCTTGGCATAGGGGTGTCTACTGT  
706 G A S A L A R E L E R L C T N F S T K T  
5461 GGCGCATCAGCACTAGCAAGGAATTGGAGAGGTTGTGCACCAATTTCTCAACCAAAACA  
726 T T R F V F H K E N Y \*  
5521 ACTACTAGATTTGTATTTTACAAGGAGAACTATT**TAG**acctcatacatagagcgatttaag  
5581 aacatgaaattatttcattatTTTTTCGAGTAAATGGAAAAAATTCATTTATTTTATTT  
5641 a
