# Supplementary material for: Genomics analysis of genes encoding respiratory burst oxidase homologs (RBOHs) in jatropha and the comparison with castor bean
Source: PeerJ journal article supplement (doi:10.7717/peerj.7263), 2019-07-11
Supplement: Supplementary_File_S2.pdf [file Supplementary_File_S2.pdf]

**Supplementary File S2. The gene model for *RcRbohC*.** The coding region is marked with uppercase letters, above which is its deduced amino acids. The transcribed untranslated regions, including 5' UTR, intron and 3' UTR sequences, are marked with lowercase letters. The start and stop codons are marked with bold letters.

```
1 ttttttctttctttacttcaatctgccacagttcaccttttaatctccgtctctttgttc
61 tgagaatcataatctcgagtggtcagattcattattccatcttcaagattcaagcttttc
1
M Q K M G R E D
121 tgttttaacttccaagaatgttgaatcaaaacccagATGCAAAAGATGGGTAGAGAAGAT
9 N S H H Q H H H S D S E L I E G D Q R V
181 AATAGCCATCACCAGCACCATCATTCTGATTCCGGAGCTGATAGAAGGTGATCAAAGGGTA
29 P Y S G P L S G P L N K R T T R K S A R
241 CCTTATAGTGGTCCTCTAAGTGGACCTCTAAACAAGAGGACGACAAGAAAGAGTGCCAGG
49 F N I P D S T S S Q D E Q Y L E V T L D
301 TTCAACATTCCTGACTCTACTTCATCCCAAGATGAACAATACTTGAAGTAACCCTTGAT
69 V R D D S V A V H S V K T A N G A E E D
361 GTTCGAGATGATTCTGTTGCTGTACACAGTGTCAAACAGCAAATGGTGCTGAAGAAGAT
89 P E L T L L A K G L E K K S N S N I V R
421 CCAGAATTAACACTGCTTGCTAAAGGACTAGAAAAGAAATCTAACTCTAACATTGTCAGG
109 N A S N R F R Q V S Q E I K R L A S F S
481 AACGCCTCTAATAGGTTTAGACAGGTTTCTCAGGAAATTAAGCGGTTAGCTTCGTTTTTCG
129 K R P P P G R L D R T K S A A A H A L K
541 AAAAGACCTCCTCCTGGTCGTCTTGACAGGACTAAATCTGCAGCTGCTCATGCTTTGAAA
149 G L K F I S K T D G G A G W A A V E K R
601 GGACTCAAGTTTATTAGCAAGACCGATGGAGGAGCTGGATGGGCTGCTGTGGAGAAACGA
169 F D D I T A S T D G L L P R S R F C E C
661 TTCGATGACATTACTGCTTCTACTGATGGATTGCTTCCTCGTTCAAGATTCTGCGAATGC
189 I G
```

721 ATAGgtagttccccgtgcaagatcaacttccttgtatgagttatttaatttttggtta  
191 M K E S K  
781 ggactaactgatgctatctgtttgtgaacttgtgaaaataacagGTATGAAGGAGTCAAA  
196 D F A G E L F N A L A R K R H I E R D S  
841 AGATTTTGCAGGGGAGCTGTTTAATGCACTTGCTAGGAAGAGGCACATAGAAAAGGATTC  
216 I G K D E L K E F W E Q I S N Q G F D S  
901 AATCGGTAAAGACGAGCTCAAGGAATTCTGGGAACAGATTCTAACCAGGGCTTTGATTC  
236 R L Q T F F D M  
961 CAGGCTTCAGACTTTCTTTGACATgtaatggtatattagaaagtgtgaatcatttattat  
1021 tatgatttttatttttgtgtgtaacaacaaaaaacgtgtattctgatttgattaccaa  
244 V D K D A D G  
1081 gcgtttaagatgtaacgtaaagatgaaaattaattgcagGGTTGATAAAGATGCAGATG  
251 R I T E E E V K E  
1141 GAAGAATTACAGAAGAGGAAGTAAAGGAGgtatagactttatttaataatcaaca  
1201 aatgtatatgatgcacatgatataatccagaagttgactcatatctttctgtagtatcaa  
1261 taatttcaatgcatcagagcatgtgcttcatatccgaagaagtttggactaattgagac  
260 I I T L S A S A N K L S  
1321 aaattttaccattccgatttgcagATTATTACCCTTAGTGCTTCTGCGAATAAACTATCA  
272 N I Q K Q A E E Y A A L I M E E L D P E  
1381 AATATTCAAAAACAAGCAGAGGAATATGCAGCCTTGATCATGGAAGAGCTGGATCCAGAG  
292 N H G Y I M  
1441 AATCATGGATATATCATGgtaaataaatgagaaatgctcttcgtgtgaccattctttcgc  
1501 ttttttttgggtacaattttattgtgataggcattgattgtgtgaatattgtttcaaata  
298 I E N L E M L L L Q G P N Q S V R V G  
1561 cagATAGAGAACTTGAAAATGCTTCTATTGCAAGGACCAAACCAATCTGTAAGAGTAGGA  
317 E S K N L S Q M L S Q K L K P S L D D N  
1621 GAGAGCAAAAACCTGAGCCAAATGCTTAGTCAAAAGCTTAAGCCTAGTTTGGATGACAAC

337 P I R R W G R S T K Y F L F D N W K R V  
1681 CCAATAAGGAGATGGGGTAGAAGCACCAAATACTTCCTTTTTGATAACTGGAAGAGAGTG  
357 W V I A L W I G V M A G L F A Y K Y V Q  
1741 TGGGTGATAGCTCTGTGGATTGGTGTATGGCTGGCCTGTTGCCTACAAATATGTGCAA  
377 Y K R R A A Y E V M G A C V C I A K G G  
1801 TATAAACGGAGAGCTGCATATGAAGTAATGGGCGCATGCGTGTGTATTGCAAAGGGAGGT  
397 A E T L K L N M A L I L L P V C R N T L  
1861 GCTGAGACACTCAAATTGAATATGGCTTTAATTTTACTACCAGTCTGCAGAAACACCCTC  
417 T W L R N K T K L G V V V P F D D N L N  
1921 ACTTGGCTTAGGAATAAGACCAAGTTAGGTGTTGTGGTTCCTTTTGATGACAATCTTAAT  
437 F H K  
1981 TTCCACAAGgtattagcttagttaattgccttcacttattcacgcccttttctactgaaag  
440 V I A V G I T  
2041 aaaacagaaagtaaataaatgggctgcgttctttttccagGTGATAGCAGTGGGAATTA  
447 I G V G L H A I S H L A C D F P R L L S  
2101 CAATTGGAGTTGGTCTGCATGCAATTTCTCATTTGGCTTGTGACTTCCCTCGCCTTCTTA  
467 A S E E K W E L M E P F F G D Q P S S Y  
2161 GTGCAAGTGAAGAGAAGTGGGAACCTTATGGAGCCATTCTTTGGGGATCAACCTTCAAGTT  
487 W H F V K S V E G V T G I I M V V L M A  
2221 ACTGGCATTTTGTAAAGTCAGTGAAGGAGTACTGGGATCATAATGGTGGTGTAAATGG  
507 I A F T L A A P W F R R N K L N L P S F  
2281 CAATAGCCTTTACTACTGGCTGCCCTTGGTTTAGGCGTAACAAGCTGAATTTGCCTTCTC  
527 L K K L T G F N A F W Y S H H L F I I V  
2341 TTCTTAAGAAGCTCACTGGTTTCAATGCCTTTTGGTACTCTCATCATCTCTTCATCATTG  
547 Y T L L I V H G Q Y L Y L T H D W Y K K  
2401 TCTACACTCTGCTCATTGTTTCATGGTCAATACCTGTACCTGACTCATGATTGGTACAAGA  
567 T

2461 AAACGgtaagacacttcttaaattgaaatcaacactatattattataaatatTTTTgaact  
568 T W M Y L A V P I I I Y A  
2521 gatccttctctgtattggcagACATGGATGTATTGGCTGTCCATTATCATTATGCT  
581 S E R L T R A L R S S I K P V T I K K  
2581 AGTGAAAGATTGACAAGGGCACTAAGGTCCAGTATCAAGCCTGTTACCATTAAGAAGgtg  
2641 agcagaacacaattagatgttcatttatagtttgtctgtattacattaagaagttatgga  
600 V A I Y P  
2701 aattagaaaagtggtgcctaaataatcttgtttttgatattgaagGTGGCTATTTATCCT  
605 G N V L A L H M S K P Q G F R Y K S G Q  
2761 GGAAATGTTCTGGCACTTCACATGTCAAAGCCTCAAGGATTCAGATATAAGAGTGGACAA  
625 Y M F V N C A A V S P F E W  
2821 TACATGTTTGTCAATTGTGCTGCTGTGTCTCCATTTGAGTGgtaggtgaatTTTTagttt  
2881 agtactaaatgttgcaggtaataataactttgctattacttaaaaaagttaaaatttc  
639 H P F S I T S A P G D D Y L S V  
2941 acatgtcaacagGCACCCATTTCCATCACTTCAGCTCCTGGAGATGACTATCTAAGCGT  
655 H I R T L G D W T R Q L K T V F S Q  
3001 TCACATCAGAACTTTGGGCGATTGGACAAGGCAACTTAAAAACAGTATTCTCACAGgcatg  
3061 tgtttttttatTTggaaatgagtgatttataatgcgtaactgtttccaagattcctat  
3121 atactgccccctctgttggcgactcgactactgtggctaattcaatttcctcatgttct  
673 V C Q P P D T G K S G L L R A D  
3181 tcgatttcacagGTGTGTCAACCACCAGATACGGGAAAAGTGGACTTCTCAGAGCGGAT  
689 G F Q G N N C P S  
3241 GGCTTTCAAGGAAATAATTGCCCAAGtaagttctttcaacttggggaaaatgcttactc  
3301 tattcacatgtatTTcatgaaataagtaatacaataaccattttcaaaggagtgcata  
3361 tgtaaagaggggtacattctgttgtgcatacgtgacaagcattatatcaggtcaacttgt  
3421 aaattatgcgtgaactctgggggtggttggccacagcaatctcatataaggaaaattcttg  
3481 catgcgcaacttagctacttgcccttagggctctcatctcactgtcatttctttgggcg

3541 gttagttgggtgggtgggggaggcggattaaaataccacaccagaagacaaaataagagg  
3601 attagaatctttgacagaattgtatatttttctattttaactacggtaatatatgttcg  
3661 gacacctatctatagtgccacgcaatcattgtcattccatgccccacatagacaggga  
3721 catctaacaacacatgcacatggcgctttgtatggaagtggcccttgttcttccctttg  
3781 ttttgaaattctgatccattgttttggttgtataaggtaacgctagtgaatttcttgaac  
698 F P R V L I D G  
3841 tgattacttaattgtggtattgacgatgatgaacagTTTCCAAGAGTACTGATTGATGG  
706 P Y G A P A Q D Y K K Y E V V L L V G L  
3901 TCCATATGGAGCACCAGCACAAGACTACAAGAAATATGAGGTGGTTCTGCTTGTGGGTTT  
726 G I G A T P M I S I V K D I V N N I R A  
3961 AGGAATTGGAGCAACCCCATGATCAGTATAGTTAAGGACATAGTTAACAATATCAGAGC  
746 R E D E E E E N A L E N G T L P K T P S  
4021 CAGGGAAGATGAAGAAGAAGAGAATGCATTAGAAAACGGTACATTGCCAAAAACACCTAG  
766 P D A Q K R R E N F K T R R A Y F Y W V  
4081 TCCTGATGCACAAAAAAGAAGAGAGAACTTTAAAACAAGAAGGGCGTACTTCTATTGGGT  
786 T R E Q G S F D W F K G V M N E V A E L  
4141 GACAAGGGAGCAAGGATCTTTTGACTGGTTTAAAGGGGTGATGAATGAGGTAGCTGAACT  
806 D H N H V I E L H N Y C T S V Y E E G D  
4201 GGACCATAACCATGTAATAGAGCTACACA ACTACTGCACTAGTGTATATGAAGAAGGGGA  
826 A R S A L I T M L Q S L H H A K N G V D  
4261 TGCAAGGTCTGCTCTAATTACCATGCTTCAGTCTCTGCATCATGCCAAGAATGGTGTGA  
846 I V S G T R V K S H F A K P N W R S V Y  
4321 CATTGTCTCAGGCACTCGTGTTAAGTCTCACTTTGCTAAGCCCAACTGGAGAAGTGTCTA  
866 K R T A L N H P N S R V G  
4381 CAAGCGCACCGCCCTAAATCACCCCTAATTCTCGAGTTGgtaagtccccattcatttttcc  
4441 ttttaacaaaacatagtattcttatctttttcacctttcttttagaaaaagcatcttct  
4501 gcattattgtgetctttctgtcagttagtaggaaaagtggttaaaaagaacacaaagata

4561 agtatatatattagtggtcgctgggcagtagaggtagtgcttttctctgataatatggatg  
4621 cttactggtttatctaaaaattaatcaccattttctgctagggaaagctttctagttaa  
879 V F Y C G A P A L T K E  
4681 caattgtctcttccctgactgcagGGGTGTTTTACTGTGGGGCACCAGCGCTAACGAAAG  
891 L R H L A S D F S H K T N T K F D F H K  
4741 AGCTACGCCATCTAGCTTCGGATTTCTCGCATAAGACAAACACCAAATTTGATTTTCATA  
911 E N F \*  
4801 AAGAGAACTTCTAAaactttcaatcggtgattaaggaagacagaagaaagaaagaaagag  
4861 aggtcttgaattgagttccatcaacatcccactcgttactgaatattctttattggcccc  
4921 cttttgttgacatttctattagcctcctttcaataatggcatagtcttattgataaatta  
4981 atcagcgagcagaagatagtgcgttggttgattgcaggggcaaccacttaagacagcaa  
5041 atgtagtgctcgtctctgtcaatcaggacatatctacaataggatttgtaaagcatttc  
5101 cttttgttcattttctttatTTTTTTTctctgctaagaaatatcttgatgatagaata  
5161 gtgaatgtctttcagttcttttgattgattgaaattggacggataaaatataagtattga  
5221 gtattaattaagtgatgtataaactacaagctTTTTTctaaatctaattatgtagtgaa  
5281 tcatcagctaa
