# Supplementary material for: Genomics analysis of genes encoding respiratory burst oxidase homologs (RBOHs) in jatropha and the comparison with castor bean
Source: PeerJ journal article supplement (doi:10.7717/peerj.7263), 2019-07-11
Supplement: Supplementary_File_S3.pdf [file Supplementary_File_S3.pdf]

**Supplementary File S3. The gene model for *RcRbohD*.** The coding region is marked with uppercase letters, above which is its deduced amino acids. The transcribed untranslated regions, including 5' UTR, intron and 3' UTR sequences, are marked with lowercase letters. The start and stop codons are marked with bold letters.

```
1 cgagcttttctctgcattgcatacaatataaagccaggagaaggttctatcgtaccattca
61 acacacagatacгааagttgcctaatacaattcttttattttccatttaaaaaaaaaaaa
121 aaaagtttcttcacctcgtttttctacattcatttttgttgttctccgccctgccagaag
1           M R K E T T T T D P H Q G K G T
181 gaaaaaaaaaacATGAGGAAAGAAACCACAACTACTGATCCTCATCAGGGCAAAGGCACT
17 Y Y F S D N T S D T E S I A S D R T A F
241 TATTATTTTTCAGATAACACCTCGGACACTGAGAGCATTGCCAGCGATCGAACTGCCTTT
37 S G P L G V G V G A P L H K K R S S K K
301 AGCGGTCCTCTTGAGTTGGAGTTGGAGCTCCTCTCCACAAAAACGTTCTCAAAGAAG
57 S A R F N L P P E T S S A G V E D P S S
361 AGCGCAAGGTTCAATCTTCCACCCGAAACCTCCTCTGCCGGTGTGAGGATCCATCCAGC
77 S Y V E I T L D I R D D S V A V H S V Q
421 TCCTATGTAGAGATTACTCTTGACATTGCGGACACTCTGTGGCGGTTACAGCGTCCAG
97 G A N Y E D P D L A L L A K R T L E N K
481 GGGGCTAATTATGAGGACCCAGATTTGGCGTTGCTTGCAAAGAGGACTCTCGAGAACAAG
117 S T S L F R N T S S H I K Q E L K R F A
541 TCTACTTCCCTGTTTCGAAACACCTCTCCCATATAAAGCAGGAGCTCAAACGTTTTGCT
137 S L S R R P S A A K R F D R T K S A A A
601 TCCCTGTCAAGGAGACCTTCTGCCGCTAAAAGGTTTGATAGAACAAGTCAGCTGCTGCT
157 H A L K G L K F I A A K T G S S A N G W
661 CATGCCCTGAAGGGCTCAAGTTCATCGCCGCAAAAACTGGATCTTCTGCAAATGGATGG
177 S S V E K R F Q Q L T V N T D G L L H C
721 TCTTCTGTTGAAAAGAGATTTCAACAACTTACTGTTAATACTGATGGTCTCCTTCACTGT
```

197 S L F G E C I G  
781 TCCTTGTTTCGGTGAATGCATAGgtactgttttttcattataactaattacatatatattt  
205 M N K D S K  
841 cctaaattcaatattaaaattttattaacttggattggacagGCATGAACAAGGATTCAAA  
211 E F A G E L F R A L A R K H N I N G D S  
901 GGAATTTGCTGGTGAATTATTTTCGCGCGCTTGCTCGGAAGCATAACATAAATGGTGATTC  
231 I N K A Q L K D F W D Q I S D E S F D S  
961 TATTAACAAGGCACAGCTAAAAGATTTCTGGGACCAGATCTCTGATGAAAGCTTCGATTC  
251 R L Q I F F D M  
1021 CCGGCTCCAAATATTCTTTGACATgtaagaattacccttcaaattttaattaaccattc  
1081 aacgaattagtcctcataatatttatatatgtatataattagtagctgaaaatgccaatg  
259 V D R D A D G R I T E E E V T E  
1141 catgcagGGTGGACAGAGACGCTGACGGAAGAATCACAGAAGAAGAAGTAACAGAGgtaa  
1201 agcgtacagtgcgatacctggtaacgttgacttttccaaacctaacctaataattaat  
1261 ggacaattccatagactactactacttattaattactagtttagtttaactaacgacat  
275 I I S L S A S A N K L S N I Q K  
1321 gatcaatttgtagATTATCAGTTTAAGTGCTTCTGCAAACAAGCTCTCCAACATTCAGAA  
291 Q A K E Y A A L I M E E L D P D N A G Y  
1381 ACAAGCCAAGGAATACGCTGCCCTAATTATGGAAGAATTAGACCCAGATAATGCTGGATA  
311 I M  
1441 CATCATGgtacctacctattattattattattgttaactgcattattaattgctatcctttt  
313 I Y N  
1501 aatttaatttgctctttcccgcccttaacttaactccaatttttcttaatacagATTTATAA  
316 L E T L L L Q A P N Q S V R I G D S R V  
1561 TCTAGAAACACTACTACTGCAAGCTCCAAACCAATCTGTCAGAATTGGAGATAGCCGAGT  
336 L S Q L L S Q K L K P T Q E T N P L K K  
1621 TTTGAGTCAACTACTGAGTCAGAACTCAAGCCTACACAAGAGACCAATCCATTAATAA

356 W Y Q K A K Y F F L D N W Q R V W I M A  
1681 ATGGTATCAAAAGGCCAAGTACTTTTTCTTAGATAACTGGCAGAGAGTGTGGATCATGGC  
376 L W L G I V A G L F S Y K F V Q Y R N K  
1741 ATTGTGGCTGGGAATCGTAGCTGGTTATTTAGTTACAAGTTTGTACAGTACCGAAATAA  
396 A V F E V M G Y C V C I A K G G A E T L  
1801 GGCTGTATTCGAGGTAATGGGCTACTGTGTTTGCATTGCCAAAGGAGGGGCAGAGACT  
416 K F N M A L I L L P V C R N T I T W L R  
1861 TAAATTCAATATGGCCTTGATTTTACTGCCTGTCTGTCGGAACACCATTACTTGGCTCAG  
436 N K T K L G V A V P F D D N L N F H K  
1921 AAACAAGACTAAGTTGGGAGTGGCTGTGCCTTTCGACGACAATCTCAATTCACAAGgt  
1981 aatcatatagtaggaaatthtaattagctagagcctagagcatgggggaattcctaattc  
455 V I A V G I A I G I G L H  
2041 tcttttgggttgatcgatcagGTGATTGCCGTTGGAATTGCCATTGGGATTGGGCTACAT  
468 A G A H L T C D F P R L L H A T E E E Y  
2101 GCAGGTGCGCATTAACTTGTGATTTCCACGGCTTCTCCATGCCACTGAAGAGGAATAC  
488 E P M E P Y F G E D Q P E N Y W W F V K  
2161 GAGCCTATGGAGCCTTATTTTGGGGAAGACCAACCCGAAAACCTACTGGTGGTTTGTAAAA  
508 G V E G V T G I I M V V L M A I A F T L  
2221 GGGGTGGAGGGGTCACAGGAATTATAATGGTAGTCCTAATGGCTATAGCCTTCACACTA  
528 A T P W F R R N K L N L P K P L K K L T  
2281 GCCACTCCTTGGTTTtaggcgtaacaagctcaatcttccaaaccctcaagaaactaaca  
548 G F N A F W Y S H H L F V I V Y A L L I  
2341 GGTTTCAATGCCTTCTGGTATTCTCATCATCTCTTCGTAATTGTCTACGCTCTCCTCATT  
568 V H G I Y L Y L T K T W Y H K T  
2401 GTCCATGGTATTTACCTCTACCTACCAAGACATGGTATCATAAAACGgtcagtccttcaa  
2461 actctcttcttcttaatgattttgagttttctccactcgcgaaaatctgatttccatatt  
584 T W M Y L A V P I I L Y A C E R

2521 ctctactatacagACATGGATGTATCTAGCAGTGCCATAATCCTTTATGCATGTGAGAG  
600 L I R A F R S R I K S V K I L K  
2581 GTTGATCAGGGCATTAGATCACGAATCAAGTCCGTTAAGATTCTCAAGgtattaacgga  
2641 aagctcttgcccattttagaatatttgttattaatattgtattgcagataattgtaaate  
2701 ttttaatttagtgcagcagtcactgttttccgtattcttaatgcatgcctactgaaatg  
616 V A V Y P G N V L A L H M  
2761 atgaacacgactcatatatagGTTGCTGTATATCCGGGAAATGTCCTAGCATTGCACATG  
629 S K P Q G F K Y K S G Q Y M F V N C A A  
2821 TCAAAGCCACAAGGCTTCAAATATAAGAGTGGACAGTACATGTTTGTCAACTGCGCTGCA  
649 V S P F E W  
2881 GTTTCTCCCTTCGAATGgtaactacctctaccttattatccgaactgtcatttttggttta  
655 H P F S I T S  
2941 gccattgaggaataatataattgaatatgtatatttgcagGCATCCATTTTCTATCACAT  
662 A P G D D Y L S V H I R T L G D W T R Q  
3001 CAGCACCAGGAGATGACTACCTCAGTGTGCATATTCGAACTTTGGGTGACTGGACCCGCC  
682 L K T V F S E  
3061 AGCTCAAACTGTTTTTCTGAGgtctgttataattagttcacaggctactgtataatct  
3121 gttctttttctcttttttggctcttcaatggaccgctaattaatctcacctgcactat  
689 V C K P P T A G K S G L L  
3181 cgttttcattggttattaatagGTTTGTAAGCCTCCAAGTGTGTAAGAGTGGACTGCT  
702 R A E G N N P G  
3241 CAGAGCTGAGGGAAACAATCCTGGgtaattgcgattatatagtatataataataacaacg  
3301 ttagtttagtcggaagttttaaatgtagtgttttatttgggagcagcaaatctaataatg  
710 F P K I L I D G P Y G A P A Q D  
3361 gaaaggaacagGTTTCAAAGATATTGATAGACGGACCGTACGGAGCTCCAGCACAGGAC  
726 Y K K Y D V V L L V G L G I G A T P M I  
3421 TACAAAAATACGACGTGGTGTGTTGGTAGGGCTAGGGATAGGGGCTACACCCATGATT

746 S I V K D I I N N M E E D D G E L E S G  
3481 AGCATTGTGAAGGACATCATTAAATAACATGGAGGAAGATGATGGTGAGTTAGAGAGTGGG  
766 R A T A A N N N N S S N N R T R K A Y F  
3541 AGAGCGACAGCTGCAAATAACAACAATAGCAGTAACAACAGGACGAGGAAAGCCTACTTC  
786 Y W V T R E Q G S F E W F K G I M N E V  
3601 TATTGGGTGACGAGGGAACAAGGTTCAATTCGAGTGGTTCAAAGGGATAATGAACGAGGTT  
806 A E M D D K G V I E L H N Y C T S V Y E  
3661 GCAGAAATGGATGATAAGGGGGTGATAGAGCTGCACA ACTACTGCACCAGCGTGTATGAA  
826 E G D A R S A L I A M L Q S L H H A K N  
3721 GAAGGAGACGCCAGGTCAGCCCTGATTGCAATGCTTCAGTCGCTCCACCATGCCAAAAAC  
846 G V D V V S G T R V K S H F A K P N W R  
3781 GGTGTCGATGTTGTTTCGGGGACAAGGGTCAAATCCCCTTTGCCAAGCCGAATTGGCGG  
866 Q V Y K K I A L H H P D A R I G  
3841 CAAGTCTACAAGAAAATTGCACTCCACCATCCTGATGCAAGAATTGgttggtcacctaa  
3901 cctateccattttattttcttctattgactttttatggaatactgattatataaagaactg  
882 V F Y C G A P A L T K E L R Q L A  
3961 aatgcagGAGTTTTCTACTGTGGGGCACCAGCACTAACAAAAGAGCTAAGACA ACTAGCT  
899 L D F S H K T S T K F D F H K E N F \*  
4021 TTGACTTCTCCACAAGACCTCCACTAAGTTCGATTTTACAAGGAGAACTTT**TAA**att  
4081 tgagcaacagggtatacagatacatacagattctgtggttagcaaattcatatattatgct  
4141 gactcactggtatacaacgtcatccaattagctacaccgggaatagttattatacgtagt  
4201 tcctctaatttaattttatttcgagtttaaatttcaattttaagaacagagaaattcttgat  
4261 acaaaaaaagaaaaagaagaagatgtaattatatttgatggagctgctaatcaagaatt  
4321 aaagttgatggaatttgataagcctgtgtttgttcattgattgcggttagtgggggatt  
4381 taccagaagaactatgggaactaaagtcacttttcttacatataattaatctatg
