# Supplementary material for: Genomics analysis of genes encoding respiratory burst oxidase homologs (RBOHs) in jatropha and the comparison with castor bean
Source: PeerJ journal article supplement (doi:10.7717/peerj.7263), 2019-07-11
Supplement: Supplementary_File_S4.pdf [file Supplementary_File_S4.pdf]

**Supplementary File S4. The gene model for *RcRbohN*.** The coding region is marked with uppercase letters, above which is its deduced amino acids. The transcribed untranslated regions, including 5' UTR, intron and 3' UTR sequences, are marked with lowercase letters. The start and stop codons are marked with bold letters.

```
1 gcaccactaatctcctctaacactttagcttaatcccatagcaccactaatctcttcta
61 cgattccacaaacaccaagccataacagcaaagatgacatcccactacatatcacaacac
121 cacaaactgctgccaccgctcacagtcggagcaacaatattgatatcacccaaaatctag
181 ccattcaagctcgccacatccagctgtttcaagatgccatatttttgcccatcgaga
241 tgaatcagtcattactagttccagcctctaccatgccaaaatctctacaacaacatag
1      M A A V E A A G R R C R L R F V D
301 acgataatgATGGCGGCGGTTGAGGCTGCAGGGCGACGGTGCAGACTGAGATTTGTTGAC
18 I E W N D A E R R F D R L A S A G K G P
361 ATTGAGTGAATGATGCGGAAAGGCGTTTCGACCGGCTAGCTTCCGCCGAAAAGGCCCT
38 E A V V K W S E F G C C L G
421 GAAGCGGTGGTAAATGGTCTGAATTTGGTTGTTTAGgtataataagagagttttgt
481 attctcatactttgttccttgatttctattcttcttttttttgcttacgtttttct
541 taacagatthagagagaaattaaggaacatatagccgatagagttgcatgagttttgt
601 ccatgttatgtacttggcactagecctatgctctctcttttagtcatgtcacaatctctg
661 tttcagaggagataatttaaaaagaaagaaagaaaaaaaacttactagacaagtgat
721 cattgcaggaagagccaatgacatcaacaaaagaaaaaaaaggctaggaatttctg
781 ttttctaatttttaaatggacaattctcgcatattttaatatgtttattcaatatactt
841 aattatttaaatctaataaatataaaatataattctaataaatgggcagttttcttttca
52      I E Q S P E F A K E I L M A L R G
901 tatttacagGCATCGAACAAATCGCCAGAATTTGCCAAAGAGATTCTAATGGCACTAAGAG
69 R R R D C R S D I T K R E L Q I Y W Q R
961 GAAGAAGAAGAGATTGCAGGAGTGATATCACAAAAGAGAACTCCAGATTTACTGGCAAC
89 L T D P C F D S R V K I Y F D M
```

1021 GATTGACTGACCCTTGCTTCGATTCAAGAGTGAAAATATATTTTGACATgtaaggatcat  
1081 gcagatatgataattgtttgtgaaattatcttatatgtatgtattgtttaattgatga  
105 C D R D M D G K I N  
1141 ggatgttttatttgtggccttattttcagGTGCGACAGAGACATGGATGGAAAAGATTAAT  
115 E I D I K Q T I L Q S C S T N K V S L T  
1201 GAGATTGACATTAAGCAGACTATTCTGCAAAGTTGTCAACAAATAAAGTGTCTCTAACC  
135 H E Q A Q E Y A A L A I E A L D T Q H S  
1261 CACGAGCAAGCACAGGAATATGCTGCCTTAGCCATTGAAGCTCTTGACACTCAACACTCG  
155 G F I Q  
1321 GGCTTCATTCAGgttcactgtttgacccttgcttccttctacagtttggccacagcat  
1381 tattatacatccggttacttttacttattaanaagtaaattaattaataacatctat  
1441 ttttttaaaaaaatctagcagtcattcctttatgaggttattactatttgagcaaaatt  
1501 aaataggcttttcttaaaatTTTTGGaccattttacttcaaaaaatttatcattttt  
1561 aattcagtttaactctttttagaagagtgaattacattgtttatattaaagaataaatt  
1621 taataaaaaataaataaatcaatttttagaattgattttaataaataagtaaatcatct  
1681 cgttggtgtgaaaatTTTTGCCacttatatccaaatgataccatttttaattttttt  
1741 ttttagtatcatataacctattttttatttcaattaatggtagctaataagacttgcc  
1801 taaaattcatgtgagttaagaactcgccaatattcaacaatccacttatactactaacat  
1861 atcaataggcgaaccaacattccacgtagctataaagtattactcctgaaaaattgaaat  
1921 ttctgatctctaggaccacactaaatatagaanaactagcacttctcttataaataacct  
1981 atttaaaatatcaataaaaaagtaagtcttatacaacctttaacaatattccttaact  
2041 cctactcaaaacaaatcatattgttggtatcttacactcttagtaacatcattatccacc  
2101 ggaattcgatttttttaacatgaatcctagtaggtggcatcaattgagacaaatatagta  
2161 gttgtggtactataaagaacgaatcgaagaaaacgatatcatttagttattaagtggca  
2221 aagcttttagtactaatatgacaattttttaagtcaagtgatgatggtaaatag  
2281 attactaacaaggagctctacaaactaattaaaattaaaatTTTAAAAATaaaatTTT  
2341 aatgctaaaaagaataaattaagtattagtactaaaatTTTtagtaccacatagctat

2401 ttagcctatTTTTagtcctaaagtttattaaactctacaaactaTTTTgtcagtaattt  
159 P D Q L I T L F R Q S I P T G S L A  
2461 gtatgcagCCAGACCAACTAATAACTCTCTTCAGACAAAGCATAACCAACAGGCTCATTAG  
177 M A Y K N K N N L N N Q E Q P T T S K T  
2521 CAATGGCGTATAAGAACAACAAATCTAAATAACCAAGAACAACCAACTACGTCGAAAA  
197 A A E I M F R T H W R Q G W I T L F W L  
2581 CTGCAGCAGAAATAATGTTCCGAACACATTGGAGACAAGGATGGATAACGTTGTTCTGGT  
217 V V C F S L F M W K F I Q Y R H R T A F  
2641 TGGTAGTTTGCTTTTCACTTTTCATGTGGAAGTTCATTCAATACAGACACAGAACAGCAT  
237 Q V M G Y C L C T A K G A A E T L K F N  
2701 TTCAAGTAATGGGTATTGCCTTTCACCGCCAAAGGAGCAGCTGAAACCTTAAAATTCA  
257 M A L I L L P V C R N T I T W L R R K S  
2761 ACATGGCTTTGATCCTTCTACCTGTTTGTGCGAATACTATTACATGGCTTCGGAGGAAGT  
277 G F S S F V P F N D N I N F H K  
2821 CAGGTTTCAGTCTTTTGTACCGTTCAATGATAACATCAACTTCCACAAGgtatTTTTTT  
2881 tatTTTTatTTTTatctacatatgttctctctttatTTcactcttgTTtattgcttaatta  
2941 tcagtgcTatcaatTTatgTTtagtgggattaattcaaattagaattgattgTTgtagtaa  
3001 ttagtaatTTctTTatTTgTgTgattatgTTgTaatagTTatgataaatttagattTcgt  
3061 tgtgtctatTTgttcaagTTattgaaCagattgataCattgTaaCagtgcTctcacaTTt  
3121 tgTTatagaactgaaatataTgtcactcaggtTctgTTagaataatTTTTctagTgcaat  
3181 gtcaaacgaataatagctctTgaaacTtcacaaacattaactaactTctgcaatTTTca  
293 L I A G G I V V G V I V  
3241 gtgacaaaagTgttctTTTTtacagCTAATTGCAGGAGGCATAGTGGTGGGTGTGATAGT  
305 H G G T H L A C D F P R I S G S D R S I  
3301 CCATGGGGAACTCACCTTGCTTGTGATTTCCCAAGAATTAGTGGGTCGGACCGATCAAT  
325 F R Q T I A G R F G Y H Q P S Y I Q I L  
3361 TTTTCGGCAAACGATAGCCGGCCGATTTGGGTATCATCAGCCATCATATATCCAAATATT

345 A T T E A A T G I A M V I L M A I A F L  
3421 AGCAACGACAGAAGCTGCAACTGGAATTGCCATGGTAATACTAATGGCAATTGCATTTTT  
365 L A T K W P R R Q S A S L P K S I R N V  
3481 GCTTGCAACAAAATGGCCTCGTCGGCAATCAGCTTCTCTGCCTAAATCCATTAGAAATGT  
385 T G Y N T F W Y S H H L L I L V Y V L L  
3541 GACTGGATATAATACTTTCTGGTACTCACACCACTTGCTCATTCTTGTCTATGTGTTGCT  
405 I I H S M F L F L T D N V T E K T  
3601 CATTATTCACCTCCATGTTCTCTCCTTACTGACAATGTCCTGAGAAAACGgtatgtat  
3661 ttcagtttggtttttcagttaaacctatatttagatgttaagttgagtcacttcacacac  
3721 tactgcaattacttaagtcctgtggtttatgtaccataagctaagctctggcagttggtg  
3781 catatgtcaaattgaaaggactcaagttcgagtttttctctcttatttgcaattaa  
422 T  
3841 tagaaaagccatgcggttgatgcattgatagagattaaaattgagacatthttggtgcagA  
423 W M Y I A L P V M L Y A G E R V A R A V  
3901 CCTGGATGTACATTGCCTTGCCAGTTATGTTATATGCCGAGAACGTGTTGCTCGAGCTG  
443 R S G F Y D A K I L K  
3961 TAAGATCAGGATTTTATGATGCAAAAATTCTGAAGgtaattgataaatgcaacttactag  
454 A  
4021 attataaaattaataatgttaacattatttagctaaggacatgttactgtatttagtagGC  
455 S I Y P G K V L S L K L H K P Q G F K H  
4081 TAGTATTTATCCAGGAAAGGTTTTATCTCTGAAGTTGCACAAACCACAAGGTTTCAAGCA  
475 K S G M Y V F L Q C P Q I S P F Q W  
4141 CAAGAGTGGGATGTATGTCTTCTACAGTGCCCTCAGATTCTCCATTCAATGgtaact  
4201 atacaacattttctggtattttttctttgtatcatttccttcttttatgtactgcctcaga  
4261 gaatccacaatttgtaatggtaaaattgaaccctgatcaattgcaacaaggaaagcac  
4321 tctactaattgactactagtccaaataatcaaattgtagcaagttaaccaaacaccttgt  
4381 ctttcttttgcgtgtacagcaaatatgtttagccatataccatctaataagtcaaaata

4441 ttecttaatTTTTccctcttgcatcaagtaagcttttatctaggtatatgcccgtctc  
493 H P F S L T S G P E D D H L S V  
4501 tcatttttcagGCACCCATTTTCATTAACCTTCAGGGCCAGAGGATGATCACTTAAGTGTG  
509 H I R T L G D W S Y K I Y Y L F Q E  
4561 CATATTAGAACTCTTGGAGATTGGAGTTACAAAATATACTATCTTTTTCAAGAGgtaaaa  
4621 gaactaactgtaataaaacacacacatacttgattgcctatcaactgaagaatgagacc  
527 A A L S G G K E Y P K  
4681 tatttcaagattcttctggggTTTTgcagGCAGCACTATCAGGGGCAAGGAATATCCAA  
538 I Y I D G P Y G A S S Q D H V K Y D I V  
4741 AAATATACATTGATGGACCCTATGGTGCTTCTTCCCAAGATCATGTCAAGTATGATATAG  
558 M L I G L G I G A T P F I S I L K D I A  
4801 TCATGCTAATTGGGCTTGGCATTGGAGCCACACCTTTCATTAGCATTCTTAAAGACATCG  
578 N D L Q M  
4861 CAAATGATCTCCAAATGgcaagtaatcaatggcttatgctctactctccatataataat  
4921 agagataaatataaaactatTTgtggtTTTgcagatttataactctgcgcgtgtctTTTTc  
4981 tgtaacaatTTTaaatataTTTactctatcagtTTTTcagatatattcttgttacatc  
5041 attagtaattggtgacttattgacatgtatcattcttcggctaataatggcactgagtaat  
5101 atatatataaaaaaagaagccaaaatgagtaaaatactatcttaaattatcacatatga  
5161 aaaaggaaaatgctaaaaaactaaattatcttactTTTTcctatactgtttcacttattc  
5221 aatatctgTTgTTTTctctcaactatcaatctaaatatgtgTTgaaaaaagttgctatag  
583 A N C E E C N I S R G P L K A Y F Y W V  
5281 GCCAATTGTGAGGAATGCAACATTTCAAGAGGTCCTTTAAAAGCTTACTTTTATTGGGTT  
603 T R E Q S S F D W F R D V L W E T S K I  
5341 ACAAGAGAACAAAGCTCTTTGACTGGTTCAGGGATGTCCTGTGGGAAACATCCAAAATT  
623 N Q K K  
5401 AACCAAAAGAAGgtaacttaacattactaattcccttgctTTTgttctctccctatggct  
627 S V V E M Q

5461 tatggtacatctacatccttattttcctctggtgatccttgcagTCTGTCGTAGAGATGCAA  
633 Y F L T N V Y Q E G D A R S A I I S A I  
5521 TACTTCTTAACCAATGTTTATCAAGAAGGGGATGCAAGATCTGCTATAATAAGTGCCATA  
653 Q A L H L A K K G I D I I S W S Q  
5581 CAAGCACTGCATCTTGCTAAGAAAGGCATTGACATCATATCTTGAGTCAGgtaaaaata  
5641 tattactaaatggtgtttttttccacttctgtaaataatgctaaattgcttatacttgggt  
5701 ttccttttacgaggagcctttgagcctgacgcctctaactgaatatctaaatgatggagc  
670 V R T Q F G R P N W F S I F S K M S S  
5761 tgtagGTACGCACGCAATTTGGCCGTCGAATTGGTTCAGCATTCTCAAAAATGTCAA  
689 K H R G E R I G  
5821 GTAAACACAGAGGAGAACGAATAGgtaaccattttatgtacctttcataatttcatttag  
5881 tatatttctatttttctccattacagccaaactatatggcttaagatgtgaaaccaatat  
5941 tcaaaagctagtaagaaaaaaaaacaatagtgagccttgagatttagtacggtgatgat  
6001 atttattattattttgattataaaaaattaatttatagatacaatttaattattttttc  
6061 atattattaatttataatatttttaaaaaataatagcaaattaactatttttagatgtcct  
6121 tgatttcttcttaaaactttatttagtgcaataatataaaaaattagaattataaattatta  
6181 tacaannnnnnnnnnnnnnnnnnnnnnnnnnnnnnnnnnnnnnnnnnnnnnnnnnnnnnnn  
6241 nnnnnnnnnnnnnnnnnnnnnnnnnnnnnnnnnnnnnnnnnnnnnnnnnnnnnnnnn  
6301 nnnnnnnnnnnnnnnnnnnnnnnnnnnnnnnnnnnnnnnnnnnnnnnnnnnnnnnnn  
6361 taattattatctaattagaaaactaatttattattaatagttatttttttaaattagaa  
6421 aagtatttaattacaaatgaaacttattaattaataaattaatagaaaaaaccaatgac  
6481 tcttcataatcaataaattaattgtgggtgttcttatatattttttcgaagttttttg  
697 V F Y C G P S A L G N E L E R L C T  
6541 acacagGGGTCTTCTACTGCGGTCCATCAGCACTGGGAAATGAACTGGAGAGATTGTGCA  
715 K F S T K T E T R F V F H K E N Y \*  
6601 CCAAATTCTCAACCAAAAACAGAACTAGATTTGTATTTCACAAGGAGAACTACTAGtgat  
6661 gtctgtttagatagattcccaaatggggaatctatagagcaattgcctaatatagtaaca

6721 gaataaccgatagagattcatatgttgacgctaagactcttgagatgatatatgttttt  
6781 tctttcccttttcaacggaaaaagatagatgtaattgataaatcaaaagtcatacaacc  
6841 ataattctcctgagccagctagacgggctgacaagagaatgagttggggcttcttttgg  
6901 ctacatcgtgagccaccagttaacattacgtgggtacaaaactaaacaaaccgctagca  
6961 aagttctcgctaagattgggtgatgtcttccattttaactgcaatttcctgtggaggagag  
7021 gttacaccattgacctgttcttctgtaccactagtcggttgtcttctattacgtctcggg  
7081 cggtgccataggagtattatctattctcatctataaatttttatataaacaatctatctc  
7141 tgcttcttatcatttttagaaaatatgattaattctaaattatatttccagcccaataa  
7201 gcaacgatacatgacaaacttatcatgtttaattattatacatattttaaaagtaaaaa  
7261 tacgtcaactctattattacattctttaaactatttcctagcacgtgatattagtaaga  
7321 tttggtttagtaattaaaggttatggcatttgatttaaaaaaaaaaacatttcaatgaa  
7381 attttttaaatatcatttgatactattggtagttaaaatgatttttaaaaaactgatac  
7441 aacataaaaattaatattaactaaaataaaaaaatgcatttaaatgaaatatatttt  
7501 tttatgtttctaaatatatcatttttattttgatttaaaattttaatttattaagtcaa  
7561 aaaatttaacataatataaacatcacatataaaataaaatacatatcaaaattacaataa  
7621 tatatgaattaaaattaataacaaaaaaaaacagaaacataataaacatcaaaaaataat  
7681 acatatatacaaatacaatatacaataaatagacatataaatttatcaaaaaattttc  
7741 agcgtatgcatcaagataagttacatggtattaagcaaaaaataattaatatatagttt  
7801 attctagtttaattctttatttttaactaaaaaattcaaaataatataaacatcac  
7861 ataacaaatacaacac
